# Supplementary material for: The variable number of tandem repeats element in DAT1 regulates in vitro dopamine transporter density
Source: PubMed Central journal article supplement (PMC1325255; doi:10.1186/1471-2156-6-55), 2005-11-27

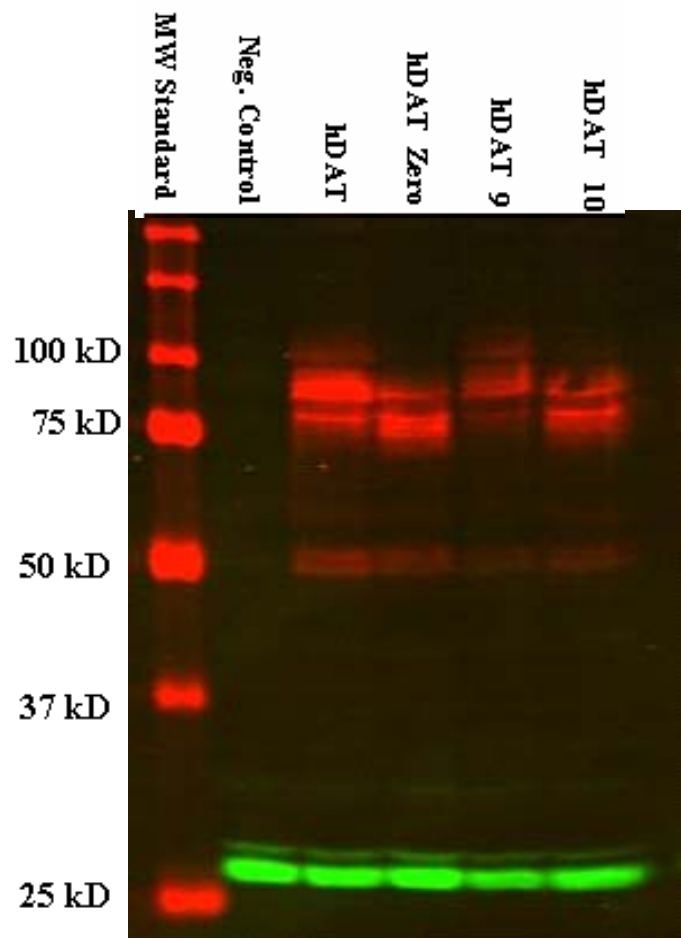

Supplement: 1471-2156-6-55-S2.pdf [file 1471-2156-6-55-S2.pdf]
